# Supplementary material
Source: publisher figshare collection journal article supplement (https://karger.figshare.com/ndownloader/files/27759699)
Supplement: Supplementary file 1 [file 27759699]

**Supplementary Table S1. Principal admission diagnostic category of 62 977 adults hospitalized for >24 hours who had a baseline eGFR ≥60 mL/min/1.73m2, by phenotype.**

|  | **NKD**  **(n=57 665)** | **AKI alone**  **(n=3 921)** | **AKD with AK1**  **(n=906)** | **AKD without AKI**  **(n=485)** |
| --- | --- | --- | --- | --- |
| Infectious | 1 571 (3) | 199 (5) | 36 (4) | 12 (2) |
| Neoplastic | 4 486 (8) | 457 (12) | 163 (18) | 78 (16) |
| Haematological | 879 (2) | 23 (1) | 4 (<1) | 2 (<1) |
| Endocrine | 1 183 (2) | 191 (5) | 25 (3) | 21 (4) |
| Mental/behavioural | 660 (1) | 56 (1) | 11 (1) | 6 (1) |
| Neurological | 2 608 (5) | 89 (2) | 22 (2) | 12 (2) |
| ENT and eyes | 1 445 (3) | 4 (<1) | 2 (<1) | 1 (<1) |
| Cardiovascular | 6 375 (11) | 855 (22) | 225 (25) | 102 (21) |
| Respiratory | 3 559 (6) | 299 (8) | 74 (8) | 49 (10) |
| Gastrointestinal | 8 749 (15) | 627 (16) | 127 (14) | 53 (11) |
| Cutaneous | 1 545 (3) | 63 (2) | 25 (3) | 16 (3) |
| Musculoskeletal | 3 816 (7) | 168 (4) | 23 (3) | 27 (6) |
| Genitourinary | 3 001 (5) | 158 (4) | 25 (3) | 5 (1) |
| Pregnancy | 0 (0) | 1 (<1) | 0 (0) | 0 (0) |
| Congenital | 145 (<1) | 11 (<1) | 0 (0) | 0 (0) |
| Other | 17 577 (30) | 716 (18) | 143 (16) | 100 (21) |
| Missing | 66 (<1) | 4 (<1) | 1 (<1) | 1 (<1) |

AKD, acute kidney diseases and disorders; AKI, acute kidney injury; NKD, no kidney disease.

**Supplementary Table S2. Baseline characteristics of 62 977 hospitalized adults with a baseline eGFR ≥60 mL/min/1.73m2, by follow-up status.**

|  | **No follow-up**  **(n=26 859)** | **Follow-up**  **(n=36 118)** |
| --- | --- | --- |
| **Male (n, %)** | 13 602 (51) | 17 937 (50) |
| **Age (mean years ± SD)** | 50.0 (18.7) | 58.2 (18.5) |
| **Smoking (n, %)** | 7 072 (26) | 10 187 (28) |
| **Diabetes (n, %)** | 2 420 (9) | 5 085 (14) |
| **Hypertension (n, %)** | 1 435 (5) | 2 815 (8) |
| **Cerebrovascular disease (n, %)** | 816 (3) | 1 509 (4) |
| **Cardiovascular disease (n, %)** | 1 629 (6) | 2 548 (7) |
| **Peripheral vascular disease (n, %)** | 332 (1) | 894 (2) |
| **Chronic heart failure (n, %)** | 441 (2) | 1 129 (3) |
| **Arrhythmia (n, %)** | 1 926 (7) | 3 476 (10) |
| **Valvular disease (n, %)** | 194 (1) | 382 (1) |
| **Lung disease (n, %)** | 1 675 (6) | 2 467 (7) |
| **Liver disease (n, %)** | 539 (2) | 1 946 (5) |
| **Haematological disease (n, %)** | 70 (<1) | 548 (2) |
| **Malignancy (n, %)** |  |  |
| *Nil* | 25 861 (96) | 32 283 (89) |
| *Non-metastatic* | 599 (2) | 2 498 (7) |
| *Metastatic* | 399 (1) | 1 337 (4) |
| **Baseline creatinine, (mean µmol/L ± SD)** | 74.2 (14.9) | 73.0 (14.7) |
| **Baseline eGFR (mean mL/min/1.73m2 ± SD)** | 91.8 (15.8) | 89.4 (15.4) |
| **Admission creatinine, (mean µmol/L ± SD)** | 75.3 (18.6) | 76.1 (23.3) |
| **Discharge creatinine (mean µmol/L ± SD)** | 73.4 (17.0) | 73.0 (18.1) |
| **Discharge eGFR (mean mL/min/1.73m2 ± SD)** | 95.2 (19.3) | 89.7 (20.3) |
| **Admission type (n, %)** |  |  |
| *Emergency* | 19 158 (71) | 23 153 (64) |
| *Elective* | 6 439 (24) | 8 842 (24) |
| *Other* | 1 262 (5) | 4 123 (11) |
| **Admission unit (n, %)** |  |  |
| *General medicine* | 9 519 (35) | 11 057 (31) |
| *Specialty medicine* | 4 551 (17) | 10 616 (29) |
| *General surgery* | 4 952 (18) | 5 433 (15) |
| *Specialty surgery* | 6 894 (26) | 7 233 (20) |
| *Missing* | 943 (4) | 1 779 (5) |
| **Diagnosis (n, %)** |  |  |
| *Sepsis* | 1 575 (6) | 3 305 (9) |
| *Cardiac surgery* | 482 (2) | 387 (1) |
| *Hypovolemia* | 1 362 (5) | 2 297 (6) |
| **Care type (n, %)** |  |  |
| *Intensive care unit* | 1 306 (5) | 1 907 (5) |
| *Coronary care unit* | 1 293 (5) | 1 655 (5) |
| **Hospital length of stay (median days [IQR])** | 2 (1 to 4) | 3 (1 to 6) |
| **Discharge destination (n, %)** |  |  |
| *Home* | 25 271 (94) | 33 941 (94) |
| *Nursing home* | 417 (2) | 1 016 (3) |
| *Other* | 1 155 (4) | 1 133 (3) |
| *Missing* | 16 (<1) | 28 (<1) |

Abbreviations: AKD, acute kidney diseases and disorders; AKI, acute kidney injury; eGFR, estimated glomerular filtration rate; IQR, interquartile range; NKD, no kidney disease; SD, standard deviation.

**Supplementary table S3. Baseline characteristics of 36 118 hospitalized adults with a baseline eGFR ≥60 mL/min/1.73m2 and at least one eGFR measurement following discharge, by major adverse kidney disorder status.**

|  | **No MAKE**  **(n=33 356)** | **MAKE**  **(n=2 762)** |
| --- | --- | --- |
| **Male (n, %)** | 16 397 (49) | 1 540 (56) |
| **Age (mean years ± SD)** | 57.1 (18.5) | 71.2 (13.4) |
| **Smoking (n, %)** | 9 291 (28) | 896 (32) |
| **Diabetes (n, %)** | 4 483 (13) | 602 (22) |
| **Hypertension (n, %)** | 2 432 (7) | 383 (14) |
| **Cerebrovascular disease (n, %)** | 1 360 (4) | 149 (5) |
| **Cardiovascular disease (n, %)** | 2 248 (7) | 300 (11) |
| **Peripheral vascular disease (n, %)** | 771 (2) | 123 (4) |
| **Chronic heart failure (n, %)** | 833 (2) | 296 (11) |
| **Arrhythmia (n, %)** | 3 005 (9) | 471 (17) |
| **Valvular disease (n, %)** | 329 (1) | 53 (2) |
| **Lung disease (n, %)** | 2 162 (6) | 305 (11) |
| **Liver disease (n, %)** | 1 670 (5) | 276 (10) |
| **Haematological disease (n, %)** | 480 (1) | 68 (2) |
| **Malignancy (n, %)** |  |  |
| *Nil* | 30 338 (91) | 1 945 (70) |
| *Non-metastatic* | 2 124 (6) | 374 (14) |
| *Metastatic* | 894 (3) | 443 (16) |
| **Baseline creatinine, (mean µmol/L ± SD)** | 72.7 (14.7) | 76.7 (14.8) |
| **Baseline eGFR (mean mL/min/1.73m2 ± SD)** | 90.2 (15.4) | 80.0 (12.8) |
| **Admission creatinine, (mean µmol/L ± SD)** | 75.1 (22.0) | 87.4 (32.3) |
| **Phenotype** |  |  |
| *NKD* | 30 178 (90) | 2 084 (75) |
| *AKI alone* | 2 263 (7) | 333 (12) |
| *AKD with AKI* | 569 (2) | 214 (8) |
| *AKD without AKI* | 346 (1) | 131 (5) |
| **Discharge creatinine (mean µmol/L ± SD)** | 72.2 (17.2) | 83.1 (24.6) |
| **Discharge eGFR (mean mL/min/1.73m2 ± SD)** | 91.2 (19.6) | 73.0 (20.5) |
| **Admission type (n, %)** |  |  |
| *Emergency* | 21 252 (64) | 1 901 (69) |
| *Elective* | 8 376 (25) | 466 (17) |
| *Other* | 3 728 (11) | 395 (14) |
| **Admission unit (n, %)** |  |  |
| *General medicine* | 10 231 (31%) | 826 (30%) |
| *Specialty medicine* | 9 574 (29%) | 1 042 (38%) |
| *General surgery* | 5 085 (15%) | 348 (13%) |
| *Specialty surgery* | 6 775 (20%) | 458 (17%) |
| *Missing* | 1 691 (5%) | 88 (3%) |
| **Diagnosis (n, %)** |  |  |
| *Sepsis* | 2 829 (8%) | 476 (17%) |
| *Cardiac surgery* | 357 (1%) | 30 (1%) |
| *Hypovolemia* | 2 013 (6%) | 284 (10%) |
| **Care type (n, %)** |  |  |
| *Intensive care unit* | 1 707 (5%) | 200 (7%) |
| *Coronary care unit* | 1 477 (4%) | 178 (6%) |
| **Hospital length of stay (median days [IQR])** | 1.0 (1.0 4.0) | 3.0 (1.0 8.0) |
| **Discharge destination (n, %)** |  |  |
| *Home* | 31 486 (94%) | 2 455 (89%) |
| *Nursing home* | 851 (3%) | 165 (6%) |
| *Other* | 993 (3%) | 140 (5%) |
| *Missing* | 26 (<1%) | 2 (<1%) |

Abbreviations: AKD, acute kidney diseases and disorders; AKI, acute kidney injury; eGFR, estimated glomerular filtration rate; NKD, no kidney disease. With the exception of cardiac surgery (p=0.94), all other comparisons were statistically significant (p<0.001).

**Supplementary Table S4. Restricted mean survival time analysis of event-free days lost due to acute kidney disorders over the first year in 36 118 hospitalised adults with a baseline eGFR ≥60 mL/min/1.73m2 and at least one eGFR measurement following discharge.**

|  | **NKD**  **(n=32 262)** | **AKI alone**  **(n=2 596)** | **AKD with AKI**  **(n=783)** | **AKD without AKI**  **(n=477)** |
| --- | --- | --- | --- | --- |
| MAKE | *(ref)*  *95% CI* | -20  -24 to -17 | -66  -76 to -56 | -55  -66 to -43 |
| CKD | *(ref)*  *95% CI* | -12  -15 to -9 | -51  -60 to -42 | -40  -50 to -29 |
| Death | *(ref)*  *95% CI* | -8  -11 to -6 | -16  -21 to -10 | -15  -22 to -9 |

Abbreviations: AKD, acute kidney diseases and disorders; AKI, acute kidney injury; CI, confidence interval; CKD, chronic kidney disease; eGFR, estimated glomerular filtration rate; MAKE, major adverse kidney event; NKD, no kidney disease. All comparisons were statistically significant (p <0.001).

**Supplementary Table S5. Overall and 12-month outcomes of 36 118 hospitalised adults with a baseline eGFR ≥60 mL/min/1.73m2 and at least one eGFR measurement following discharge, by phenotype and using an alternative definition of CKD (25% drop in eGFR from baseline sustained for 3 months).**

|  | **NKD**  **(n=32 262)** | **AKI alone**  **(n=2 596)** | **AKD with AKI**  **(n=783)** | **AKD without AKI**  **(n=477)** |
| --- | --- | --- | --- | --- |
| **Overall** |  |  |  |  |
| Median follow-up (years)  *IQR* | 2.62  0.91 to 4.48 | 1.82  0.29 to 3.75 | 2.18  0.59 to 3.98 | 2.69  1.05 to 4.64 |
| CKD (n, %)  *Per 100 person-years* | 1 898 (6%)  2.08 | 308 (12%)  5.25 | 269 (34%)  13.80 | 147 (31%)  10.48 |
| **12 months** |  |  |  |  |
| CKD (n, %)  *Per 100 person-years* | 564 (2%)  2.38 | 185 (7%)  11.65 | 183 (23%)  34.42 | 75 (16%)  20.73 |

Abbreviations: AKD, acute kidney diseases and disorders; AKI, acute kidney injury; CKD, chronic kidney disease; eGFR, estimated glomerular filtration rate; IQR, interquartile range; NKD, no kidney disease. All comparisons were statistically significant (p <0.001).

**Supplementary Figure S1. Study flow diagram.**

**Supplementary Figure S2. Multivariable logistic regression analysis of risk factors for acute kidney diseases and disorders in 62 977 hospitalized adults with a baseline eGFR ≥60 mL/min/1.73m2.**

**Supplementary Figure S3. Discriminative ability of a multivariable logistic regression model for acute kidney diseases and disorders in 62 977 hospitalized adults with a baseline eGFR ≥60 mL/min/1.73m2.**

**Supplementary Figure S4. Adjusted MAKE-free survival curves for 36 118 hospitalized adults with a baseline eGFR ≥60 mL/min/1.73m2 and at least one eGFR measurement following discharge, by phenotype.**

**Supplementary Figure S5. Log-log plot of MAKE-free survival, by acute kidney disorder phenotype.**

**Supplementary Figure S6. Multivariable competing risk regression analysis of the risk of chronic kidney disease in 36 118 hospitalized adults with a baseline eGFR ≥60 mL/min/1.73m2 and at least one eGFR measurement following discharge, by phenotype.**

**Supplementary Figure S7. Univariable competing risk regression analysis of the risk of kidney failure in 36 118 hospitalized adults with a baseline eGFR ≥60 mL/min/1.73m2 and at least one eGFR measurement following discharge, by phenotype.**

**Supplementary Figure S8. Multivariable Cox regression analysis of the risk of death in 36 118 hospitalized adults with a baseline eGFR ≥60 mL/min/1.73m2 and at least one eGFR measurement following discharge, by phenotype.**

**Supplementary Figure S9. Estimated glomerular filtration rate at 12 months for 36 118 hospitalised adults with a baseline eGFR ≥60 mL/min/1.73m2 and at least one eGFR measurement following discharge, by phenotype. The white circle and dark grey box represent the median and interquartile range of values, respectively. The width of the light grey area represents the estimated kernel density of values.**

**Supplementary Figure S10. Multilevel mixed effects linear regression analysis of eGFR at 12 months in 36 118 hospitalized adults with a baseline eGFR ≥60 mL/min/1.73m2 and at least one eGFR measurement following discharge, by phenotype.**

**Supplementary Figure S11. Multivariable logistic regression analysis of the hospital readmission at 30 days in 36 118 hospitalized adults with a baseline eGFR ≥60 mL/min/1.73m2 and at least one eGFR measurement following discharge, by phenotype.**

**Supplementary Figure S12. Sensitivity multivariable Cox regression analysis of the risk of major adverse kidney events in 36 118 hospitalized adults with a baseline eGFR ≥60 mL/min/1.73m2 and at least one eGFR measurement following discharge, using an alternative definition of CKD (25% drop in eGFR from baseline sustained for 3 months)**

**Supplementary Figure S13. Sensitivity multivariable Cox regression analysis of the risk of major adverse kidney events over the entire follow-up period in 36 118 hospitalized adults with a baseline eGFR ≥60 mL/min/1.73m2 and at least one eGFR measurement following discharge.**

**Supplementary Figure S14. Sensitivity multivariable Cox regression analysis of the risk of major adverse kidney events in 62 977 hospitalized adults with a baseline eGFR ≥60 mL/min/1.73m2, using multiple imputation for the 26 859 patients with missing outcome data.**

**Appendix 1. Diagnostic (ICD-10) and procedure (ACHI) codes used to identify candidate predictor variables from hospital administrative databases.**

| **Comorbidity** | **ICD-10 and ACHI codes** |
| --- | --- |
| Smoking | F17, T65.2, Z72.0, Z86.43 |
| Diabetes | E10-14, Y42.3, Z92.22  95550-14 |
| Hypertension | I10-15, U82.3 |
| Cerebrovascular disease | G45, G83.81, I63-66, I69  33500 |
| Cardiovascular disease | I20-22, I24-25, U82.1, Z95.5  38215, 38218, 38306, 38312, 38497. 38500, 38503, 38637 |
| Peripheral vascular disease | E11.51-52, I70-71, I73.1, I73.8-9, I74, I77.1, I79.0, I79.2, K55.1, K55.8-9, Z95.8-9  32718, 32742, 32745, 32760, 32763, 32766, 33103, 33112, 33115, 33116, 33118, 33121, 33124, 33145, 33154,33172, 33521, 33539, 33548, 33554, 33806, 33845, 34103, 34106, 35202, 35303, 35309, 35317, 38550, 38553, 38556, 38559, 38562, 38565, 38572, 60000, 60048, 60060, 60072, 60078 |
| Chronic heart failure | E11.53, I09.2, I11.0, I13.0, I13.2, I25.5, I42.0, I42.5-9, I43, I50 |
| Arrhythmia | 11718, 11721, 11727, 13400, 38256, 38290, 38350, 38353, 38368, 38390, 38393, 90203 |
| Valvular disease | Z95.2  38270, 38475, 38477, 38480, 38488, 38489, 38490, 38493, 38553, 38556, 38559, 38562, 38565 |
| Lung disease | J84.1, J84.8-9, J96.1, U83.1-4  38421, 38424 |
| Liver disease | B18, I85-86, I98, K70-74, K76, T86.4, Z94.4  30409, 30411, 30412, 30414, 30415, 30418, 30421, 30476, 90317, 90319, 90318, 90334 |
| Leukaemia | 13706-06, M9801/3, M9805/3, M9823/3, M9835/3, M9836/3, M9837/3, M9861/3, M9866/3, M9867/3, M9871/3, M9872/3, M9891/3, M9895/3, M9896/3, M9920/3, M9945/3 |
| Lymphoma | M9591/3, M9650/3, M9652/3, M9663/3, M9671/3, M9673/3, M9680/3, M9687/3, M9688/3, M9698/3, M9699/3, M9700/3, M9731/3, M9732/3, M9733/3, M9761/3, M9765/1 |
| Non-metastatic malignancy | M8000/3, M8010/3, M8012/3, M8013/3, M8041/3, M8046/3, M8120/3, M8140/3, M8144/3, M8160/3, M8170/3, M8170/9, M8169/3, M8200/3, M8240/3, M8246/3, M8250/3, M8255/3, M8260/3, M8263/3, M8312/3, M8330/3, M8337/3, M8720/3, M8721/3, M8742/3, M8743/3, M8772/3 |
| Metastatic malignancy | C77-80  M8000/6, M8010/6, M8012/6, M8013/6, M8041/6, M8046/6, M8070/6, M8071/6, M8120/6, M8140/6, M8144/6, M8160/6, M8170/6, M8169/6, M8240/6, M8246/6, M8255/6, M8260/6, M8263/6, M8312/6, M8330/6, M8337/6, M8720/6, M8721/6, M8742/6, M8743/6, M8772/6 |

ACHI, Australian Classification of Health Interventions; ICD-10, International Classification of Diseases, 10th Revision.

**Appendix 2. KDIGO definitions of acute kidney injury and acute kidney diseases and disorders**

| **AKI definition** | **AKD definition** |
| --- | --- |
| Increase in SCr by ≥50% within 7 days,  *OR* | AKI,  *OR* |
| Increase in SCr by ≥26.5 μmol/l within 48 hours | GFR <60 ml/min/1.73m2 for <3 months, *OR* |
|  | Decrease in GFR by 35% for <3 months, *OR* |
|  | Increase in SCr by >50% for <3 months |

AKD, acute kidney diseases and disorders; AKI, acute kidney injury; GFR, glomerular filtration rate; KDIGO Kidney Disease Improving Global Outcomes; SCr, serum creatinine.
